# Supplementary material
Source: Springer Nature journal article supplement (https://www.springermedizin.de/resource/supplementary/12887_2012_720_MOESM7_ESM.docx/9475574)
Supplement: MOESM7 [file 9475574]

**Table 4. Availability of essential drugs and infusions as observed from the facility inspection on the day of survey and aggregated opinion of health staff on general availability of same items.**

| Facility | F1 | F2 | F3 | F4 | F5 | F6 | F7 | F8 | F9 | F10 | F11 | F12 | F13 | F14 | HW |
| --- | --- | --- | --- | --- | --- | --- | --- | --- | --- | --- | --- | --- | --- | --- | --- |
| Oxygen |  |  |  |  |  |  |  |  |  |  |  |  |  |  | Most |
| Normal saline |  |  |  |  |  |  |  |  |  |  |  |  |  |  | Alw |
| Hartman/Rl solution |  |  |  |  |  |  |  |  |  |  |  |  |  |  | Alw |
| 5% Dextrose |  |  |  |  |  |  |  |  |  |  |  |  |  |  | Alw |
| 10% Dextrose |  |  |  |  |  |  |  |  |  |  |  |  |  |  | Occa |
| 50% Dextrose |  |  |  |  |  |  |  |  |  |  |  |  |  |  | Com |
| ORS |  |  |  |  |  |  |  |  |  |  |  |  |  |  | Com |
| Diazepam |  |  |  |  |  |  |  |  |  |  |  |  |  |  | Most |
| Injection Phenobarbitone |  |  |  |  |  |  |  |  |  |  |  |  |  |  | Most |
| Injection Adrenaline |  |  |  |  |  |  |  |  |  |  |  |  |  |  | Most |
| Injection Vitamin K |  |  |  |  |  |  |  |  |  |  |  |  |  |  | Com |
| Ceftriaxone |  |  |  |  |  |  |  |  |  |  |  |  |  |  | Most |
| Flucloxacillin |  |  |  |  |  |  |  |  |  |  |  |  |  |  | Occa |
| Amoxycillin |  |  |  |  |  |  |  |  |  |  |  |  |  |  | Most |
| Ampicillin |  |  |  |  |  |  |  |  |  |  |  |  |  |  | Most |
| Gentamycin |  |  |  |  |  |  |  |  |  |  |  |  |  |  | Most |
| IV Chloramphenicol |  |  |  |  |  |  |  |  |  |  |  |  |  |  | Most |
| Oral Fluconazole |  |  |  |  |  |  |  |  |  |  |  |  |  |  | Com |
| Benzyl Penicilli |  |  |  |  |  |  |  |  |  |  |  |  |  |  | Most |
| Tetracycline eye ointment |  |  |  |  |  |  |  |  |  |  |  |  |  |  | Com |
| Aminophylln |  |  |  |  |  |  |  |  |  |  |  |  |  |  | Most |
| Prednisolone |  |  |  |  |  |  |  |  |  |  |  |  |  |  | Most |
| Salbutamol |  |  |  |  |  |  |  |  |  |  |  |  |  |  | Most |
| Paracetamol syrup |  |  |  |  |  |  |  |  |  |  |  |  |  |  | Occa |
| Metronidazole |  |  |  |  |  |  |  |  |  |  |  |  |  |  | Most |
| Erythromycin |  |  |  |  |  |  |  |  |  |  |  |  |  |  | Most |

Key: Available at the time of visit Not available at the time of visit

From the health workers experience HW: Never available (Nev) = 0 months, occasionally available (Occa) = 1 - 3 Months, Commonly available (Com) = 4 - 6 months Most available (Most) = 7 - 9 months, Always (Alw) = 10 -12 months
